# Supplementary material for: Cation exchange in an anionic metal–organic framework enhancing propylene/propane separation
Source: Royal Society of Chemistry journal article supplement (doi:10.1039/d3ce00761h), 2023-01-01
Supplement: d3ce00761h1.pdf [file d3ce00761h1.pdf]

## Supporting Information

### **Cation exchange in an anionic Metal-organic Framework enhancing propylene/propane separation**

Xue Zhang, † Hui-Juan Tang, † Min Zeng, Rong Yang, Yu Wang \* and Kai-Jie Chen \*

<sup>a</sup> Key Laboratory of Special Functional and Smart Polymer Materials of Ministry of Industry and Information Technology, Xi'an Key Laboratory of Functional Organic Porous Materials, School of Chemistry and Chemical Engineering, Northwestern Polytechnical University, Xi'an, Shaanxi, China

\* Corresponding author. E-mail addresses: [wychem@nwpu.edu.cn](mailto:wychem@nwpu.edu.cn) (Y. Wang) and [ckjiscon@nwpu.edu.cn](mailto:ckjiscon@nwpu.edu.cn) (K. -J. Chen)

†These authors contributed equally to this work.

## Table of contents

### S1 General description of **1**

### S2 Supplementary methods

#### 1 Ideal Adsorbed Solution Theory Calculations

##### 1.1 Single-site Langmuir-Freundlich model

##### 1.2 IAST calculations

#### 2 Isostatic heat of adsorption

#### 3 Breakthrough Experiments

### S3 Supplementary figures

**Fig. S1** Partial Enlarged view of the **1** along the crystallographic c-axis.

**Fig. S2** PXRD patterns for **1** and **1·K** under various conditions.

**Fig. S3** TGA curves for **1** and **1·K**.

**Fig. S4** SEM images (a,b) , EDS analysis and elemental mapping (c) of **1**.

**Fig. S5** SEM images (a,b) , EDS analysis and elemental mapping (c) of **1·K**.

**Fig. S6** Pore size distribution for **1** and **1·K** using data measured with N<sub>2</sub> at 77 K.

**Fig. S7** The BET and Langmuir plots for **1** (a ,b) and **1·K** (c ,d) obtained from the N<sub>2</sub> adsorption isotherm at 77 K.

**Fig. S8** (a) C<sub>3</sub>H<sub>6</sub> and C<sub>3</sub>H<sub>8</sub> adsorption isotherms for **1** and **1·K** at 273 K. (b-c) C<sub>2</sub>H<sub>4</sub> and C<sub>2</sub>H<sub>6</sub> adsorption isotherms for **1** and **1·K** at 273 K and 298 K.

**Fig. S9** Virial fittings of C<sub>3</sub>H<sub>6</sub> adsorption isotherms for **1·K** at 273 K and 298 K.

**Fig. S10** Virial fittings of C<sub>3</sub>H<sub>8</sub> adsorption isotherms for **1·K** at 273 K and 298 K.

**Fig. S11** Virial fittings of C<sub>3</sub>H<sub>6</sub> adsorption isotherms for **1** at 273 K and 298 K.

**Fig. S12** Virial fittings of C<sub>3</sub>H<sub>8</sub> adsorption isotherms for **1** at 273 K and 298 K.

**Fig. S13** Virial fittings of C<sub>2</sub>H<sub>4</sub> adsorption isotherms for **1·K** at 273 K and 298 K.

**Fig. S14** Virial fittings of C<sub>2</sub>H<sub>6</sub> adsorption isotherms for **1·K** at 273 K and 298 K.

**Fig. S15** Virial fittings of C<sub>2</sub>H<sub>4</sub> adsorption isotherms for **1** at 273 K and 298 K.

**Fig. S16** Virial fittings of C<sub>2</sub>H<sub>6</sub> adsorption isotherms for **1** at 273 K and 298 K.

**Fig. S17** Comparison of  $Q_{st}$  of **1** and **1·K** for C<sub>2</sub>H<sub>4</sub> and C<sub>2</sub>H<sub>6</sub>.

**Fig. S18** Single-site L-F model fitting for C<sub>3</sub>H<sub>6</sub> isotherm of **1·K** at 273 K.

**Fig. S19** Single-site L-F model fitting for C<sub>3</sub>H<sub>6</sub> isotherm of **1·K** at 298 K.

**Fig. S20** Single-site L-F model fitting for C<sub>3</sub>H<sub>8</sub> isotherm of **1·K** at 273 K..

**Fig. S21** Single-site L-F model fitting for C<sub>3</sub>H<sub>8</sub> isotherm of **1·K** at 298 K..

**Fig. S22** Single-site L-F model fitting for C<sub>3</sub>H<sub>6</sub> isotherm of **1** at 273 K.

**Fig. S23** Single-site L-F model fitting for C<sub>3</sub>H<sub>6</sub> isotherm of **1** at 298 K.

**Fig. S24** Single-site L-F model fitting for C<sub>3</sub>H<sub>8</sub> isotherm of **1** at 273 K.

**Fig. S25** Single-site L-F model fitting for C<sub>3</sub>H<sub>8</sub> isotherm of **1** at 298 K.

**Fig. S26** Single-site L-F model fitting for C<sub>2</sub>H<sub>4</sub> isotherm of **1·K** at 273 K.

**Fig. S27** Single-site L-F model fitting for C<sub>2</sub>H<sub>4</sub> adsorption isotherm of **1·K** at 298 K.

**Fig. S28** Single-site L-F model fitting for C<sub>2</sub>H<sub>6</sub> adsorption isotherm of **1·K** at 273 K.

**Fig. S29** Single-site L-F model fitting for C<sub>2</sub>H<sub>6</sub> isotherm of **1·K** at 298 K.

**Fig. S30** Single-site L-F model fitting for C<sub>2</sub>H<sub>4</sub> isotherm of **1** at 273 K.

**Fig. S31** Single-site L-F model fitting for C<sub>2</sub>H<sub>4</sub> isotherm of **1** at 298 K.

**Fig. S32** Single-site L-F model fitting for C<sub>2</sub>H<sub>6</sub> isotherm of **1** at 273 K.

**Fig. S33** Single-site L-F model fitting for C<sub>2</sub>H<sub>6</sub> isotherm of **1** at 298 K.

**Fig. S34** IAST selectivities of **1** and **1·K** for equimolar C<sub>2</sub>H<sub>4</sub>/C<sub>2</sub>H<sub>6</sub> at 298 K.

**Fig. S35** Outlet C<sub>3</sub>H<sub>6</sub> (red) and C<sub>3</sub>H<sub>8</sub> (blue) compositions of the adsorption-desorption cycle in the breakthrough experiment for **1** (a) and **1·K** (b).

**Fig. S36** The single dynamic breakthrough curves of **1** (a) and **1·K** (b) with equimolar C<sub>2</sub>H<sub>4</sub>/C<sub>2</sub>H<sub>6</sub> gas mixtures at 298 K and 100 kPa. (c) Cycling stability of **1·K**.

## **S4 Supplementary tables**

**Table S1** ICP analysis results of **1·K**.

**Table S2** Summary of the adsorption capacity of C<sub>3</sub>H<sub>6</sub> and C<sub>3</sub>H<sub>8</sub>, as well as C<sub>3</sub>H<sub>6</sub>/C<sub>3</sub>H<sub>8</sub> (50/50) selectivity in some MOFs.

## **References**

## S1 General description of 1

According to reported literature, **1** crystallizes in the orthorhombic space group  $Fddd$  and has a 3D anionic framework built with triangle clusters  $[\text{Cu}_3(\mu_3\text{-OH})]$  and 4-pyrazolecarboxylate, showing ultramicroporous channels with aperture size of  $6.3 \times 6.8$  Å (**Fig. S1**). Because of the negative charge of the framework ( $[\text{Cu}_3(\mu_3\text{-OH})(\text{pyc})_3]^-$ ), an extra free dimethylamine cation is needed to counterbalance, yielding a formula of  $[\text{Me}_2\text{NH}_2][\text{Cu}_3(\mu_3\text{-OH})(\text{pyc})_3]$  for **1**. Previous studies showed that the free  $\text{Me}_2\text{NH}_2^+$  ions can be exchanged by  $\text{Li}^+$  ions to improve the pore volume and  $\text{H}_2$  uptake.

## S2 Supplementary methods

### 1 Ideal Adsorbed Solution Theory Calculations

#### 1.1 Single-site Langmuir-Freundlich (L-F) model

The selectivity was calculated to evaluate the  $\text{C}_3\text{H}_6/\text{C}_3\text{H}_8$  and  $\text{C}_2\text{H}_4/\text{C}_2\text{H}_6$  separation performance based on the IAST method. Single-site Langmuir-Freundlich model was used to fit the  $\text{C}_3\text{H}_8$  or  $\text{C}_3\text{H}_6$  adsorption isotherms obtained at 273 K and 298 K.

$$q = A_1 \frac{b_1 x^{c_1}}{1 + b_1 x^{c_1}} \quad (\text{S1})$$

Where  $q$  is the quantity adsorbed (mmol/g), and  $A_1$  is the saturation loadings for adsorption sites  $A$  (mmol/g).  $b_1$  represents the constant ( $\text{kPa}^{-c_1}$ ), and  $x$  represents the pressure of bulk gas at equilibrium with adsorbed phase (kPa). The  $c_1$  represents the Freundlich exponent.

#### 1.2 IAST calculations

IAST calculations of C<sub>3</sub>H<sub>6</sub>/C<sub>3</sub>H<sub>8</sub> (50/50, v/v) adsorption at 298 K were performed by

$$S_{abs} = \frac{q_{C_3H_6} / q_{C_3H_8}}{p_{C_3H_6} / p_{C_3H_8}} \quad (S2)$$

Similarly, the IAST selectivity for C<sub>2</sub>H<sub>4</sub>/C<sub>2</sub>H<sub>6</sub> (50/50, v/v) adsorption at 298 K was defined as

$$S_{abs} = \frac{q_{C_2H_4} / q_{C_2H_6}}{p_{C_2H_4} / p_{C_2H_6}} \quad (S3)$$

where  $q$  is the uptake quantities in the mixture, and  $p$  is the corresponding mole fraction used in the feed gas mixture.

## 2 Isotheric heat of adsorption

At 273 K and 298 K, the Virial equation comprising of the temperature-independent parameters  $a_i$  and  $b_j$  was employed to calculate the enthalpies of adsorption for C<sub>3</sub>H<sub>6</sub> and C<sub>3</sub>H<sub>8</sub> in **1** and **1-K**.

$$\ln P = \ln N + \frac{1}{k} \sum_{i=0}^m a_i N_i + \sum_{j=0}^n b_j N_j \quad (S4)$$

Here,  $P$  is the pressure expressed in kPa,  $N$  is the amount adsorbed in mmol g<sup>-1</sup>,  $k$  is the temperature in K,  $a_i$  and  $b_j$  are Virial coefficients, and  $m$  as well as  $n$  represent the number of coefficients required to adequately describe the isotherms. The values of the Virial coefficients  $a_0$  through  $a_m$  were then used to calculate the isosteric heat of adsorption using the following expression:

$$Q_{st} = -R \sum_{i=0}^m a_i N_i \quad (S5)$$

$Q_{st}$  represents the coverage-dependent isosteric heat of adsorption ( $\text{kJ mol}^{-1}$ ) and  $R$  is the universal gas constant. Based on the adsorption isotherms measured by Micromeritics 3Flex analyzer, the heat enthalpy of  $\text{C}_3\text{H}_6$ ,  $\text{C}_3\text{H}_8$ ,  $\text{C}_2\text{H}_4$  and  $\text{C}_2\text{H}_6$  for samples were determined at 273 K and 298 K as well as 0-100 kPa.

### 3 Breakthrough Experiments

Breakthrough experiments for the  $\text{C}_3\text{H}_6/\text{C}_3\text{H}_8$  mixtures and  $\text{C}_2\text{H}_4/\text{C}_2\text{H}_6$  were performed in a homemade apparatus at 298 K. In the separation experiment, sample **1** (0.88 g for cycle test) and **1-K** (0.631 g for cycle test) samples were packed into a stainless-steel column, followed by activating at 373 K for 12 h under the Helium flow of  $20 \text{ mL min}^{-1}$ . Then, the adsorption column was dropped to 298 K, followed by introducing the equimolar  $\text{C}_3\text{H}_6/\text{C}_3\text{H}_8$  gas mixtures. The raw mixed gas flow rate was maintained at  $1 \text{ mL min}^{-1}$ . The gas chromatograph monitored the effluent gas by a thermal conductivity detector (TCD).

The  $\text{C}_3\text{H}_6$  purity ( $c$ ) is defined by the peak area of  $\text{C}_3\text{H}_6$ , we calculated  $\text{C}_3\text{H}_6$  purity according to the following equation:

$$c = \frac{C_i(\text{C}_3\text{H}_6)}{C_i(\text{C}_3\text{H}_6) + C_i(\text{C}_3\text{H}_8)} \quad (\text{S6})$$

where  $C_i(\text{C}_3\text{H}_6)$  and  $C_i(\text{C}_3\text{H}_8)$  represent the peak areas of component  $\text{C}_3\text{H}_6$  and  $\text{C}_3\text{H}_8$  in a single injection.

### S3 Supplementary figures

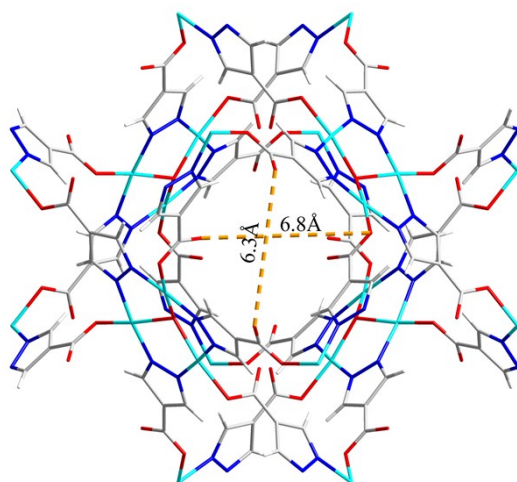

**Fig. S1** Partial Enlarged view of the **1** along the crystallographic *c*-axis.

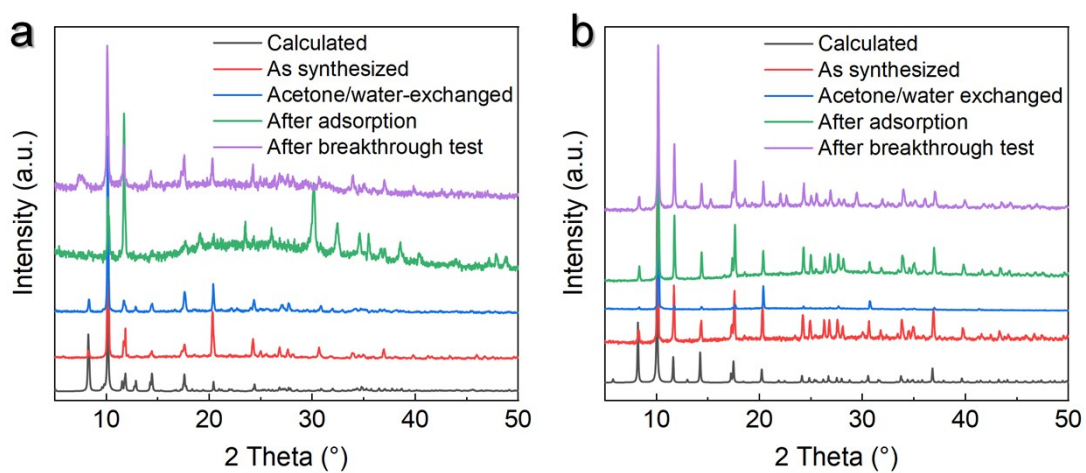

**Fig. S2** PXR D patterns for **1** (a) and **1·K** (b) under various conditions.

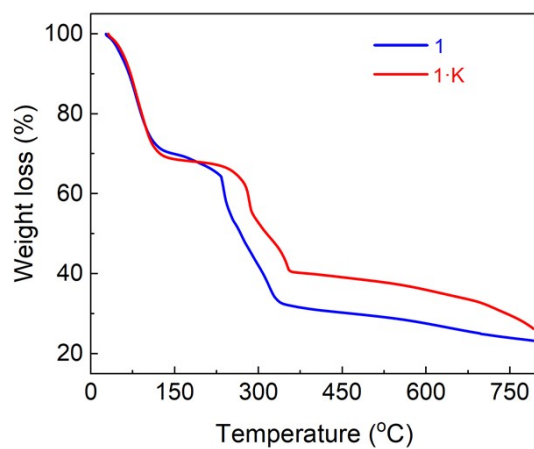

**Fig. S3** TGA curves for **1** and **1·K**.

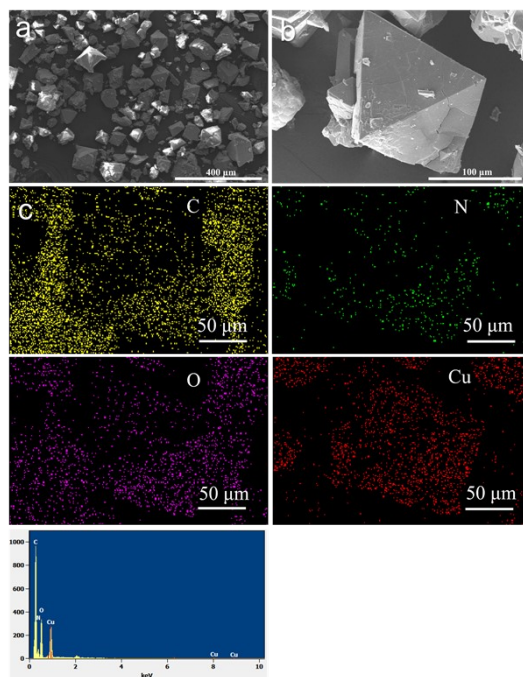

**Fig. S4** SEM images (a,b) ,EDS analysis and elemental mapping (c) of **1**.

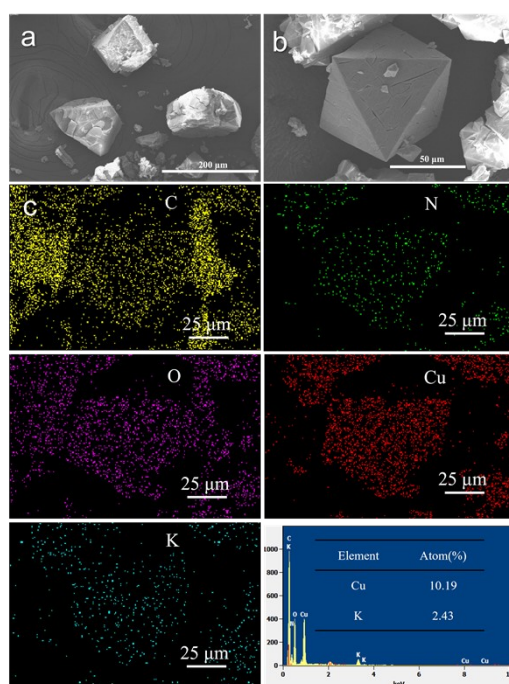

**Fig. S5** SEM images (a,b) , EDS analysis and elemental mapping (c) of **1·K**.



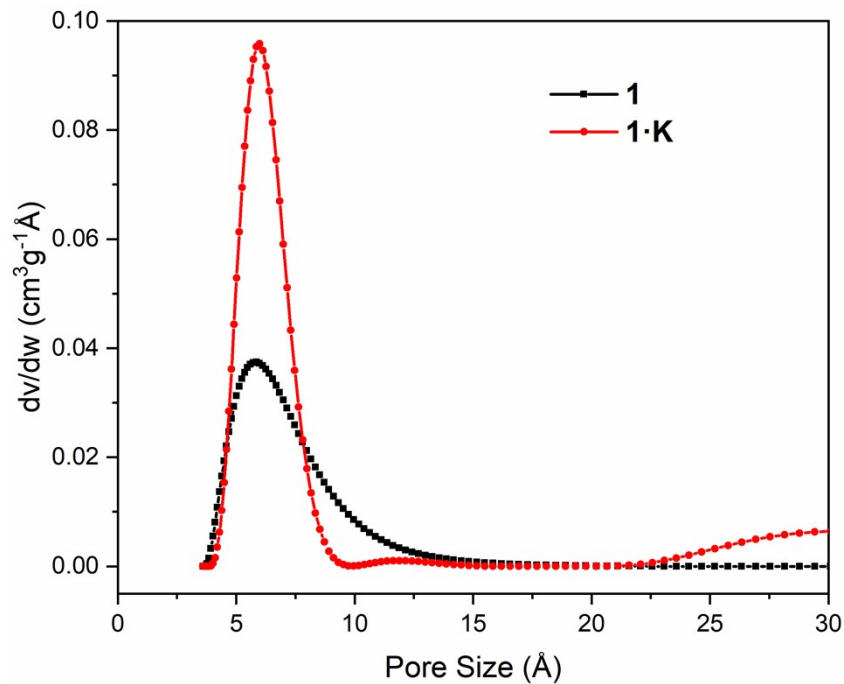

**Fig. S6** Pore size distribution for **1** and **1·K** using data measured with N<sub>2</sub> at 77 K.

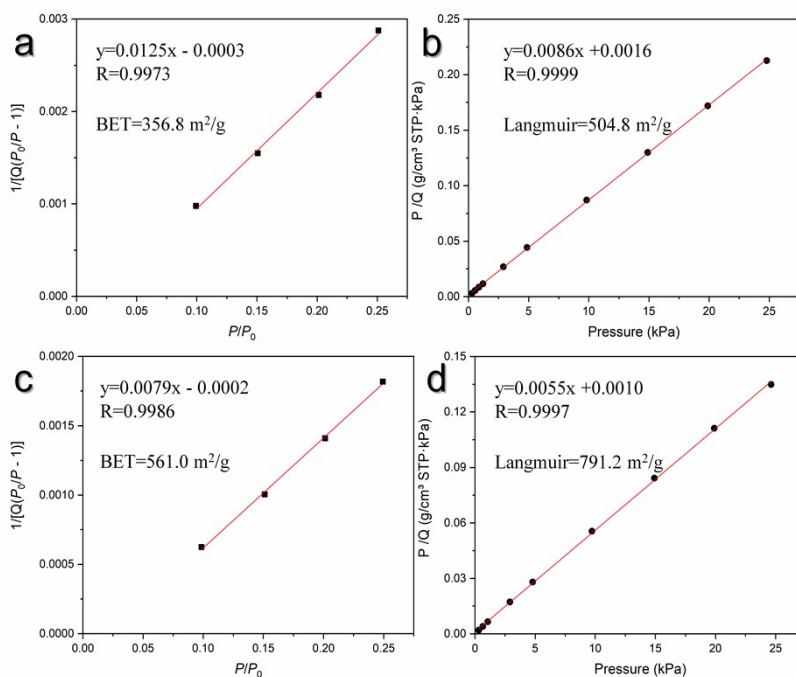

**Fig. S7** The BET and Langmuir plots for **1** (a, b) and **1·K** (c, d) obtained from the N<sub>2</sub> adsorption isotherm at 77 K.

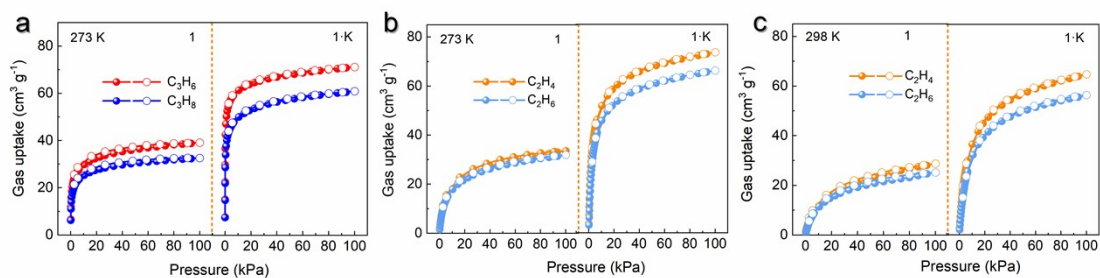

**Fig. S8** (a)  $C_3H_6$  and  $C_3H_8$  adsorption isotherms for **1** and **1-K** at 273 K. (b-c)  $C_2H_4$  and  $C_2H_6$  adsorption isotherms for **1** and **1-K** at 273 K and 298 K.

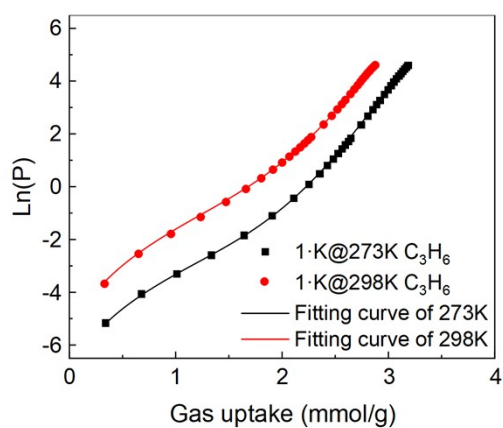

| Model            | Qst1 (User)                                                                  |                             |
|------------------|------------------------------------------------------------------------------|-----------------------------|
| Equation         | $\ln(x)+1/k*(a_0+a_1*x+a_2*x^2+a_3*x^3+a_4*x^4+a_5*x^5)+(b_0+b_1*x+b_2*x^2)$ |                             |
| Plot             | F                                                                            | H                           |
| $a_0^*$          | $-5006.82723 \pm 188.01755$                                                  | $-5006.82723 \pm 188.01755$ |
| $a_1^*$          | $-917.33065 \pm 293.91899$                                                   | $-917.33065 \pm 293.91899$  |
| $a_2^*$          | $664.14862 \pm 275.07716$                                                    | $664.14862 \pm 275.07716$   |
| $a_3^*$          | $-504.13597 \pm 171.04172$                                                   | $-504.13597 \pm 171.04172$  |
| $a_4^*$          | $215.93163 \pm 50.82169$                                                     | $215.93163 \pm 50.82169$    |
| $a_5^*$          | $-28.78876 \pm 5.6346$                                                       | $-28.78876 \pm 5.6346$      |
| $b_0^*$          | $13.98534 \pm 0.64021$                                                       | $13.98534 \pm 0.64021$      |
| $b_1^*$          | $3.57993 \pm 0.78841$                                                        | $3.57993 \pm 0.78841$       |
| $b_2^*$          | $-0.45957 \pm 0.21884$                                                       | $-0.45957 \pm 0.21884$      |
| k                | $273 \pm 0$                                                                  | $298 \pm 0$                 |
| Reduced Chi-Sqr* | 0.00116                                                                      |                             |
| R-Square (COD)   | 0.99985                                                                      | 0.99981                     |
| R-Square (COD)*  | 0.99984                                                                      |                             |
| Adj. R-Square*   | 0.99981                                                                      |                             |

**Fig. S9** Virial fittings (lines) of  $C_3H_6$  adsorption isotherms (symbols) for **1-K** at 273 K and 298 K.

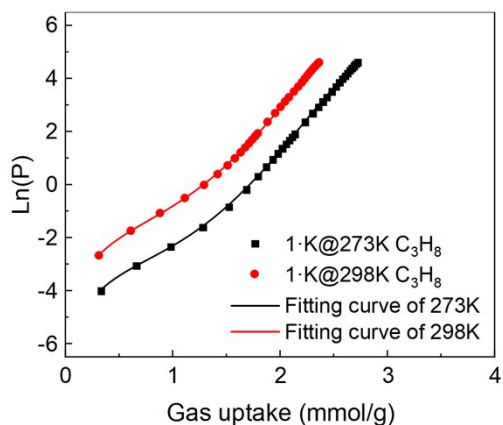

| Model            | Qst1 (User)                                                         |                        |
|------------------|---------------------------------------------------------------------|------------------------|
| Equation         | $\ln(x)+1/k*(a0+a1*x+a2*x^2+a3*x^3+a4*x^4+a5*x^5)+(b0+b1*x+b2*x^2)$ |                        |
| Plot             | F                                                                   | H                      |
| a0*              | -4419.77852 ± 164.7089                                              | -4419.77852 ± 164.7089 |
| a1*              | -19.47386 ± 236.0566                                                | -19.47386 ± 236.0566   |
| a2*              | -868.52321 ± 103.50125                                              | -868.52321 ± 103.50125 |
| a3*              | 530.36506 ± 42.62402                                                | 530.36506 ± 42.62402   |
| a4*              | -96.35574 ± 6.91771                                                 | -96.35574 ± 6.91771    |
| a5               | 0 ± 0                                                               | 0 ± 0                  |
| b0*              | 12.94902 ± 0.57924                                                  | 12.94902 ± 0.57924     |
| b1*              | 1.7916 ± 0.83188                                                    | 1.7916 ± 0.83188       |
| b2*              | 0.79854 ± 0.27619                                                   | 0.79854 ± 0.27619      |
| k                | 273 ± 0                                                             | 298 ± 0                |
| Reduced Chi-Sqr* | 7.84181E-4                                                          |                        |
| R-Square (COD)   | 0.99986                                                             | 0.99984                |
| R-Square (COD)*  | 0.99986                                                             |                        |
| Adj. R-Square*   | 0.99984                                                             |                        |

**Fig. S10** Virial fittings (lines) of  $C_3H_8$  adsorption isotherms (symbols) for **1·K** at 273 K and 298 K.

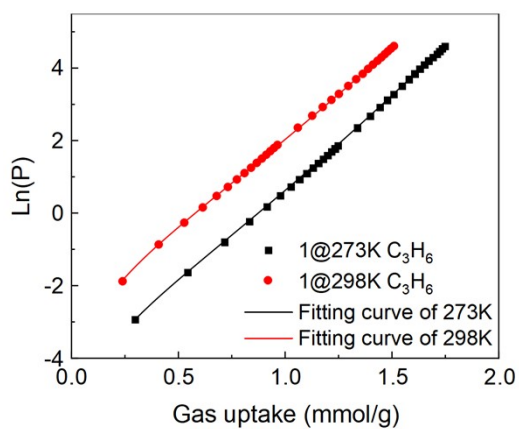

| Model            | Qst1 (User)                                                         |                        |
|------------------|---------------------------------------------------------------------|------------------------|
| Equation         | $\ln(x)+1/k*(a0+a1*x+a2*x^2+a3*x^3+a4*x^4+a5*x^5)+(b0+b1*x+b2*x^2)$ |                        |
| Plot             | F                                                                   | H                      |
| a0*              | -4710.18644 ± 50.68502                                              | -4710.18644 ± 50.68502 |
| a1*              | -152.49548 ± 45.75214                                               | -152.49548 ± 45.75214  |
| a2*              | 319.19763 ± 29.28074                                                | 319.19763 ± 29.28074   |
| a3*              | -25.91119 ± 9.55016                                                 | -25.91119 ± 9.55016    |
| a4               | 0 ± 0                                                               | 0 ± 0                  |
| a5               | 0 ± 0                                                               | 0 ± 0                  |
| b0*              | 14.84699 ± 0.17835                                                  | 14.84699 ± 0.17835     |
| b1*              | 2.51783 ± 0.15345                                                   | 2.51783 ± 0.15345      |
| b2               | 0 ± 0                                                               | 0 ± 0                  |
| k                | 273 ± 0                                                             | 298 ± 0                |
| Reduced Chi-Sqr* | 2.61516E-4                                                          |                        |
| R-Square (COD)   | 0.99993                                                             | 0.99992                |
| R-Square (COD)*  | 0.99993                                                             |                        |
| Adj. R-Square*   | 0.99992                                                             |                        |

**Fig. S11** Virial fittings (lines) of  $C_3H_6$  adsorption isotherms (symbols) for **1** at 273 K and 298 K.

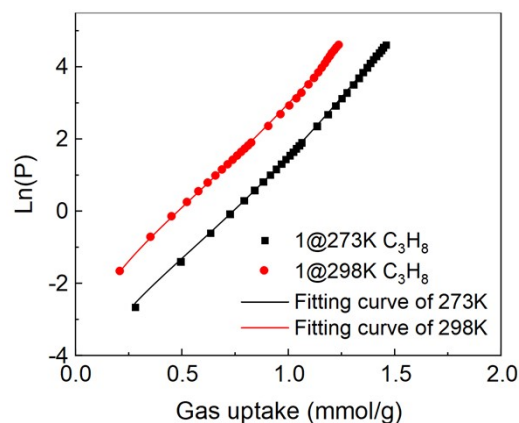

| Model            | Qst1 (User)                                                                                                                    |                         |
|------------------|--------------------------------------------------------------------------------------------------------------------------------|-------------------------|
| Equation         | $\ln(x)+1/k \cdot (a_0+a_1 \cdot x+a_2 \cdot x^2+a_3 \cdot x^3+a_4 \cdot x^4+a_5 \cdot x^5) + (b_0+b_1 \cdot x+b_2 \cdot x^2)$ |                         |
| Plot             | F                                                                                                                              | H                       |
| a0*              | -4184.2734 ± 137.67625                                                                                                         | -4184.2734 ± 137.67625  |
| a1*              | -1033.73578 ± 150.04678                                                                                                        | -1033.73578 ± 150.04678 |
| a2*              | 443.33473 ± 111.85284                                                                                                          | 443.33473 ± 111.85284   |
| a3*              | 20.30381 ± 43.28763                                                                                                            | 20.30381 ± 43.28763     |
| a4               | 0 ± 0                                                                                                                          | 0 ± 0                   |
| a5               | 0 ± 0                                                                                                                          | 0 ± 0                   |
| b0*              | 13.4409 ± 0.48123                                                                                                              | 13.4409 ± 0.48123       |
| b1*              | 5.49181 ± 0.49433                                                                                                              | 5.49181 ± 0.49433       |
| b2               | 0 ± 0                                                                                                                          | 0 ± 0                   |
| k                | 273 ± 0                                                                                                                        | 298 ± 0                 |
| Reduced Chi-Sqr* |                                                                                                                                | 0.0017                  |
| R-Square (COD)   | 0.99984                                                                                                                        | 0.99908                 |
| R-Square (COD)*  |                                                                                                                                | 0.9995                  |
| Adj. R-Square*   |                                                                                                                                | 0.99946                 |

**Fig. S12** Virial fittings (lines) of C<sub>3</sub>H<sub>8</sub> adsorption isotherms (symbols) for **1** at 273 K and 298 K.

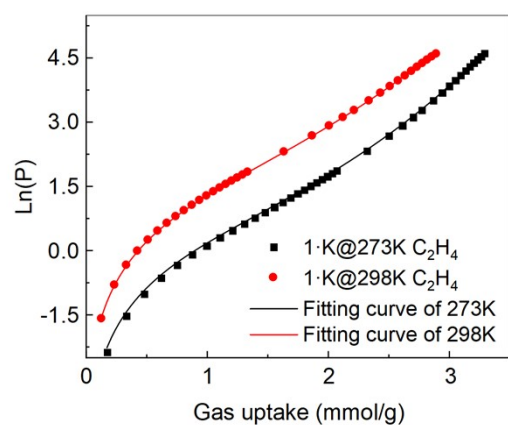

| Model            | Qst1 (User)                                                                                                                    |                        |
|------------------|--------------------------------------------------------------------------------------------------------------------------------|------------------------|
| Equation         | $\ln(x)+1/k \cdot (a_0+a_1 \cdot x+a_2 \cdot x^2+a_3 \cdot x^3+a_4 \cdot x^4+a_5 \cdot x^5) + (b_0+b_1 \cdot x+b_2 \cdot x^2)$ |                        |
| Plot             | F                                                                                                                              | H                      |
| a0*              | -3498.70867 ± 85.49463                                                                                                         | -3498.70867 ± 85.49463 |
| a1*              | 81.40875 ± 135.58641                                                                                                           | 81.40875 ± 135.58641   |
| a2*              | -331.96602 ± 97.69685                                                                                                          | -331.96602 ± 97.69685  |
| a3*              | 205.09702 ± 61.91304                                                                                                           | 205.09702 ± 61.91304   |
| a4*              | -49.11264 ± 19.55163                                                                                                           | -49.11264 ± 19.55163   |
| a5*              | 5.01237 ± 2.26141                                                                                                              | 5.01237 ± 2.26141      |
| b0*              | 12.06362 ± 0.29264                                                                                                             | 12.06362 ± 0.29264     |
| b1*              | 1.32431 ± 0.41618                                                                                                              | 1.32431 ± 0.41618      |
| b2*              | -0.06544 ± 0.12504                                                                                                             | -0.06544 ± 0.12504     |
| k                | 273 ± 0                                                                                                                        | 298 ± 0                |
| Reduced Chi-Sqr* |                                                                                                                                | 7.25149E-4             |
| R-Square (COD)   | 0.9998                                                                                                                         | 0.99978                |
| R-Square (COD)*  |                                                                                                                                | 0.99979                |
| Adj. R-Square*   |                                                                                                                                | 0.99977                |

**Fig. S13** Virial fittings (lines) of C<sub>2</sub>H<sub>4</sub> adsorption isotherms (symbols) for **1·K** at 273 K and 298 K.

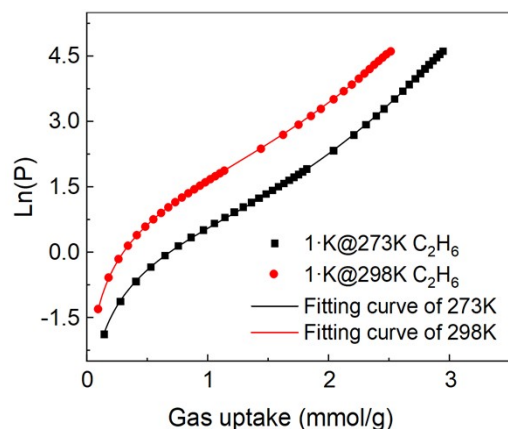

| Model            | Qst1 (User)                                                         |                       |
|------------------|---------------------------------------------------------------------|-----------------------|
| Equation         | $\ln(x)+1/k*(a0+a1*x+a2*x^2+a3*x^3+a4*x^4+a5*x^5)+(b0+b1*x+b2*x^2)$ |                       |
| Plot             | F                                                                   | H                     |
| a0*              | -3187.46905 ± 24.4918                                               | -3187.46905 ± 24.4918 |
| a1*              | -322.49482 ± 21.21173                                               | -322.49482 ± 21.21173 |
| a2*              | -137.07742 ± 17.37189                                               | -137.07742 ± 17.37189 |
| a3*              | 90.07978 ± 8.46227                                                  | 90.07978 ± 8.46227    |
| a4*              | -10.16046 ± 1.38117                                                 | -10.16046 ± 1.38117   |
| a5               | 0 ± 0                                                               | 0 ± 0                 |
| b0*              | 11.65804 ± 0.08418                                                  | 11.65804 ± 0.08418    |
| b1*              | 1.95396 ± 0.05251                                                   | 1.95396 ± 0.05251     |
| b2               | 0 ± 0                                                               | 0 ± 0                 |
| k                | 273 ± 0                                                             | 298 ± 0               |
| Reduced Chi-Sqr* | 1.82104E-4                                                          |                       |
| R-Square (COD)   | 0.99995                                                             | 0.99993               |
| R-Square (COD)*  | 0.99994                                                             |                       |
| Adj. R-Square*   | 0.99994                                                             |                       |

**Fig. S14** Virial fittings (lines) of C<sub>2</sub>H<sub>6</sub> adsorption isotherms (symbols) for **1·K** at 273 K and 298 K.

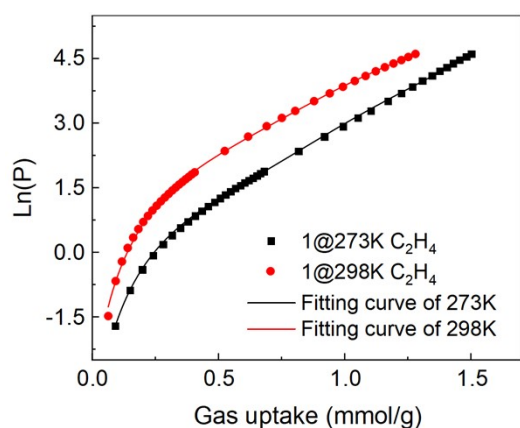

| Model            | Qst1 (User)                                                         |                         |
|------------------|---------------------------------------------------------------------|-------------------------|
| Equation         | $\ln(x)+1/k*(a0+a1*x+a2*x^2+a3*x^3+a4*x^4+a5*x^5)+(b0+b1*x+b2*x^2)$ |                         |
| Plot             | F                                                                   | H                       |
| a0*              | -3347.62801 ± 115.03469                                             | -3347.62801 ± 115.03469 |
| a1*              | 1169.34683 ± 457.70152                                              | 1169.34683 ± 457.70152  |
| a2*              | -5428.47011 ± 713.62248                                             | -5428.47011 ± 713.62248 |
| a3*              | 8814.90521 ± 953.74172                                              | 8814.90521 ± 953.74172  |
| a4*              | -5272.48246 ± 676.33617                                             | -5272.48246 ± 676.33617 |
| a5*              | 1189.17574 ± 174.94348                                              | 1189.17574 ± 174.94348  |
| b0*              | 12.17158 ± 0.38832                                                  | 12.17158 ± 0.38832      |
| b1*              | 6.20626 ± 1.37207                                                   | 6.20626 ± 1.37207       |
| b2*              | -4.85943 ± 0.95583                                                  | -4.85943 ± 0.95583      |
| k                | 273 ± 0                                                             | 298 ± 0                 |
| Reduced Chi-Sqr* | 0.00147                                                             |                         |
| R-Square (COD)   | 0.99983                                                             | 0.99916                 |
| R-Square (COD)*  | 0.99951                                                             |                         |
| Adj. R-Square*   | 0.99945                                                             |                         |

**Fig. S15** Virial fittings (lines) of C<sub>2</sub>H<sub>4</sub> adsorption isotherms (symbols) for **1** at 273 K and 298 K.

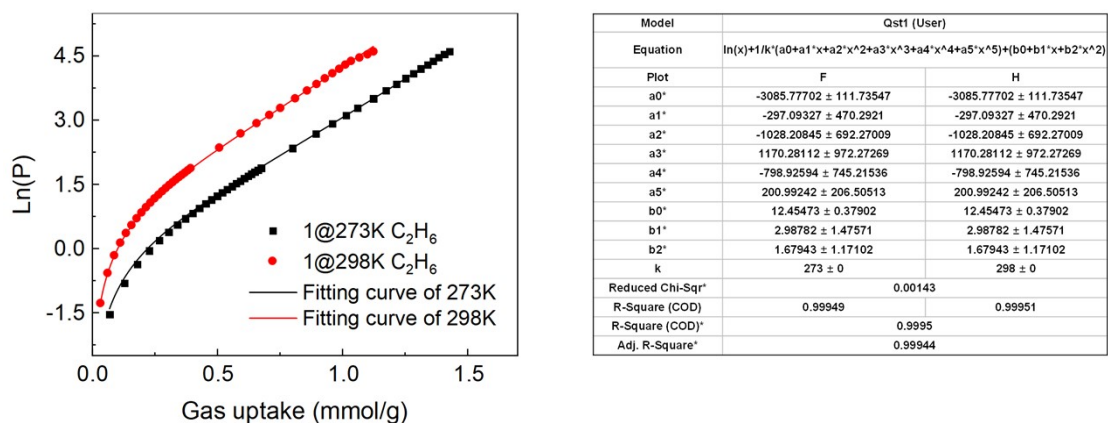

**Fig. S16** Virial fittings (lines) of  $C_2H_6$  adsorption isotherms (symbols) for **1** at 273 K and 298 K.

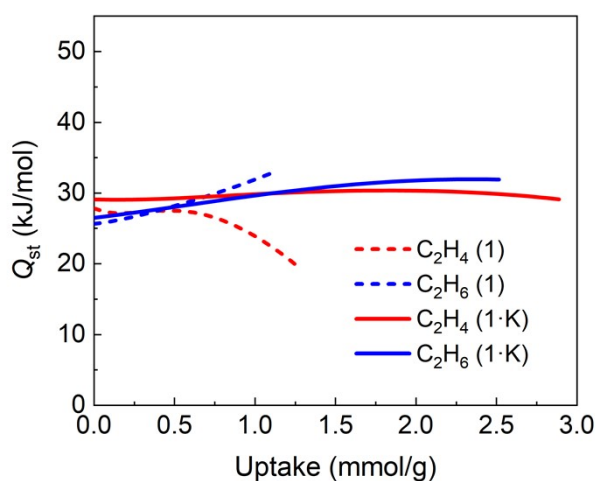

**Fig. S17** Comparison of  $Q_{st}$  of **1** and **1·K** for  $C_2H_4$  and  $C_2H_6$ .

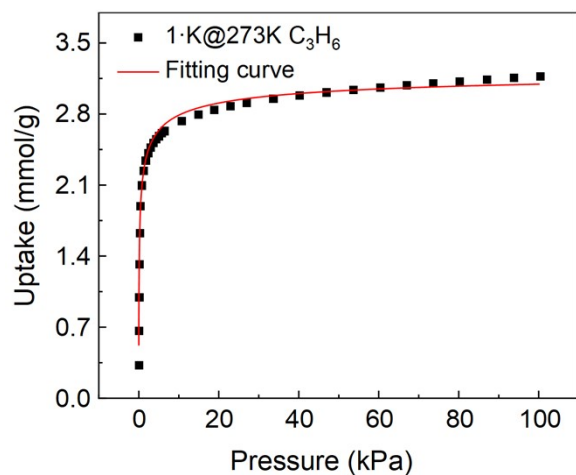

| Model           | LFUser (User)            |
|-----------------|--------------------------|
| Equation        | $A1*b1*x^c1/(1+b1*x^c1)$ |
| Plot            | B                        |
| A1              | $3.28829 \pm 0.04722$    |
| b1              | $1.95531 \pm 0.12733$    |
| c1              | $0.45531 \pm 0.02034$    |
| Reduced Chi-Sqr | 0.00464                  |
| R-Square (COD)  | 0.99222                  |
| Adj. R-Square   | 0.99168                  |

**Fig. S18** Single-site Langmuir-Freundlich (L-F) model fitting for  $C_3H_6$  isotherm of **1·K** at 273 K.

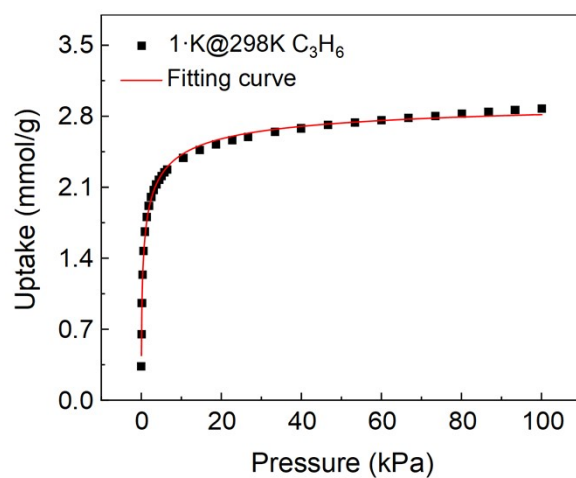

| Model           | LFUser (User)            |
|-----------------|--------------------------|
| Equation        | $A1*b1*x^c1/(1+b1*x^c1)$ |
| Plot            | D                        |
| A1              | $3.02635 \pm 0.03274$    |
| b1              | $1.18126 \pm 0.03951$    |
| c1              | $0.52743 \pm 0.01662$    |
| Reduced Chi-Sqr | 0.00174                  |
| R-Square (COD)  | 0.99644                  |
| Adj. R-Square   | 0.99618                  |

**Fig. S19** Single-site Langmuir-Freundlich (L-F) model fitting for  $C_3H_6$  isotherm of **1·K** at 298 K.

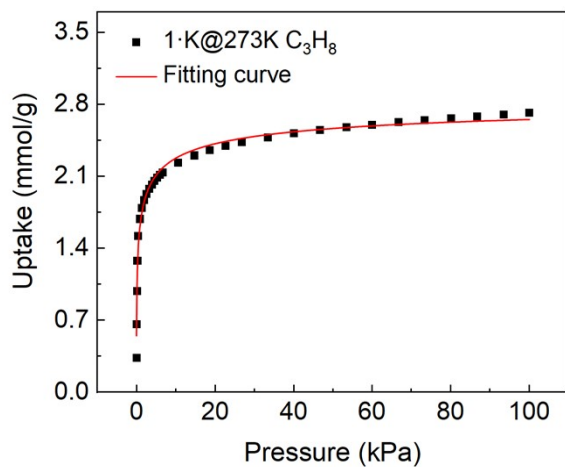

| Model           | LFUser (User)                                      |
|-----------------|----------------------------------------------------|
| Equation        | $A1 \cdot b1 \cdot x^{c1} / (1 + b1 \cdot x^{c1})$ |
| Plot            | B                                                  |
| A1              | $2.93874 \pm 0.07316$                              |
| b1              | $1.27308 \pm 0.09588$                              |
| c1              | $0.42987 \pm 0.02642$                              |
| Reduced Chi-Sqr | 0.00497                                            |
| R-Square (COD)  | 0.9875                                             |
| Adj. R-Square   | 0.98661                                            |

**Fig. S20** Single-site Langmuir-Freundlich (L-F) model fitting for C<sub>3</sub>H<sub>8</sub> isotherm of **1-K** at 273 K.

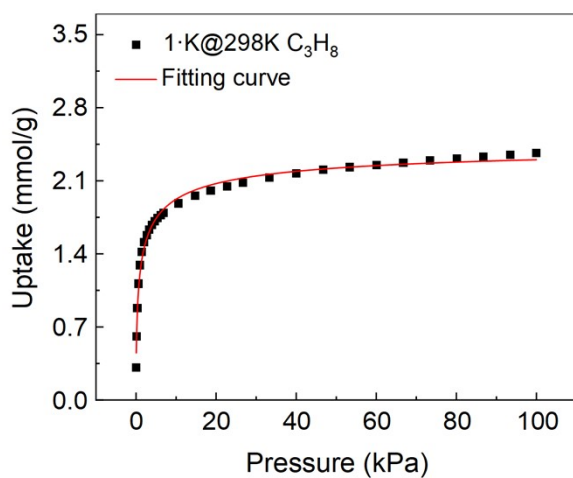

| Model           | LFUser (User)                                      |
|-----------------|----------------------------------------------------|
| Equation        | $A1 \cdot b1 \cdot x^{c1} / (1 + b1 \cdot x^{c1})$ |
| Plot            | D                                                  |
| A1              | $2.49693 \pm 0.04565$                              |
| b1              | $0.95158 \pm 0.04437$                              |
| c1              | $0.5467 \pm 0.02799$                               |
| Reduced Chi-Sqr | 0.00263                                            |
| R-Square (COD)  | 0.9913                                             |
| Adj. R-Square   | 0.99065                                            |

**Fig. S21** Single-site Langmuir-Freundlich (L-F) model fitting for C<sub>3</sub>H<sub>8</sub> isotherm of **1-K** at 298 K.



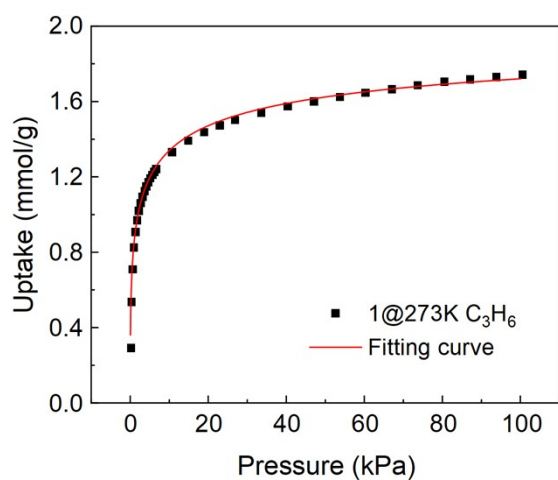

| Model           | LFUser (User)            |
|-----------------|--------------------------|
| Equation        | $A1*b1*x^c1/(1+b1*x^c1)$ |
| Plot            | B                        |
| A1              | $2.10059 \pm 0.0383$     |
| b1              | $0.68378 \pm 0.02111$    |
| c1              | $0.41054 \pm 0.01291$    |
| Reduced Chi-Sqr | $3.38283E-4$             |
| R-Square (COD)  | 0.99768                  |
| Adj. R-Square   | 0.99752                  |

**Fig. S22** Single-site Langmuir-Freundlich (L-F) model fitting for C<sub>3</sub>H<sub>6</sub> isotherm of **1** at 273 K.

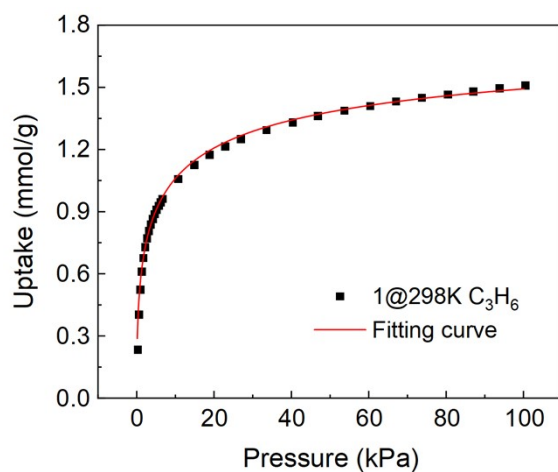

| Model           | LFUser (User)            |
|-----------------|--------------------------|
| Equation        | $A1*b1*x^c1/(1+b1*x^c1)$ |
| Plot            | D                        |
| A1              | $1.88818 \pm 0.03832$    |
| b1              | $0.43437 \pm 0.01106$    |
| c1              | $0.46937 \pm 0.01383$    |
| Reduced Chi-Sqr | $2.19789E-4$             |
| R-Square (COD)  | 0.99834                  |
| Adj. R-Square   | 0.99822                  |

**Fig. S23** Single-site Langmuir-Freundlich (L-F) model fitting for C<sub>3</sub>H<sub>6</sub> isotherm of **1** at 298 K.

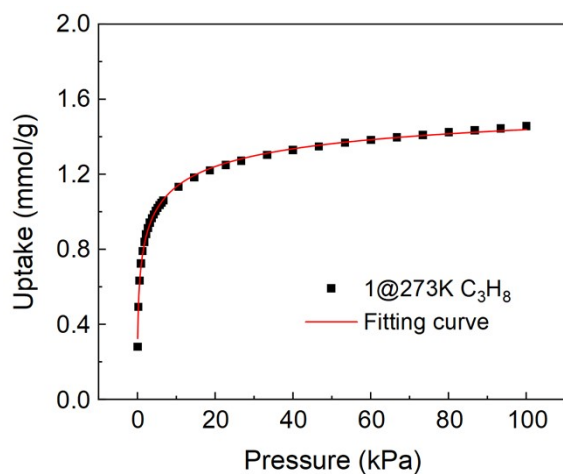

| Model           | LFUser (User)                                      |
|-----------------|----------------------------------------------------|
| Equation        | $A1 \cdot b1 \cdot x^{c1} / (1 + b1 \cdot x^{c1})$ |
| Plot            | B                                                  |
| A1              | $1.7088 \pm 0.02225$                               |
| b1              | $0.73019 \pm 0.01657$                              |
| c1              | $0.43056 \pm 0.01079$                              |
| Reduced Chi-Sqr | $1.52131E-4$                                       |
| R-Square (COD)  | 0.9984                                             |
| Adj. R-Square   | 0.99829                                            |

**Fig. S24** Single-site Langmuir-Freundlich (L-F) model fitting for C<sub>3</sub>H<sub>8</sub> isotherm of **1** at 273 K.

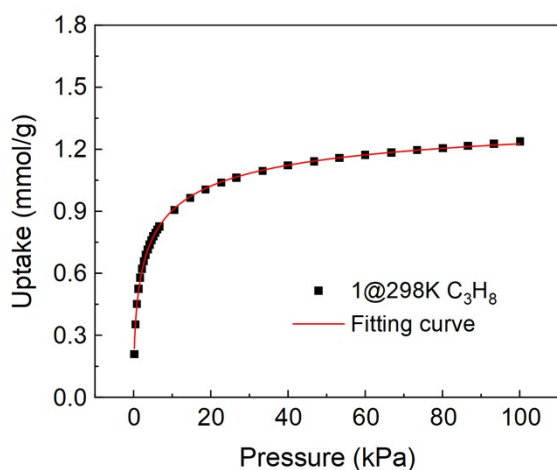

| Model           | LFUser (User)                                      |
|-----------------|----------------------------------------------------|
| Equation        | $A1 \cdot b1 \cdot x^{c1} / (1 + b1 \cdot x^{c1})$ |
| Plot            | D                                                  |
| A1              | $1.42986 \pm 0.01183$                              |
| b1              | $0.48853 \pm 0.00545$                              |
| c1              | $0.54551 \pm 0.00879$                              |
| Reduced Chi-Sqr | $5.42528E-5$                                       |
| R-Square (COD)  | 0.99938                                            |
| Adj. R-Square   | 0.99933                                            |

**Fig. S25** Single-site Langmuir-Freundlich (L-F) model fitting for C<sub>3</sub>H<sub>8</sub> isotherm of **1** at 298 K.

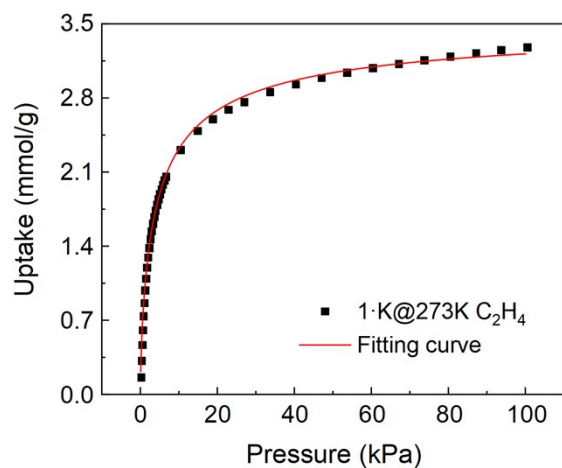

| Model           | LFUser (User)                |
|-----------------|------------------------------|
| Equation        | $A1*b1*x^{c1}/(1+b1*x^{c1})$ |
| Plot            | B                            |
| A1              | $3.53072 \pm 0.02869$        |
| b1              | $0.3575 \pm 0.00471$         |
| c1              | $0.72825 \pm 0.01304$        |
| Reduced Chi-Sqr | 0.00103                      |
| R-Square (COD)  | 0.99887                      |
| Adj. R-Square   | 0.99881                      |

**Fig. S26** Single-site Langmuir-Freundlich (L-F) model fitting for  $C_2H_4$  isotherm of **1·K** at 273 K.

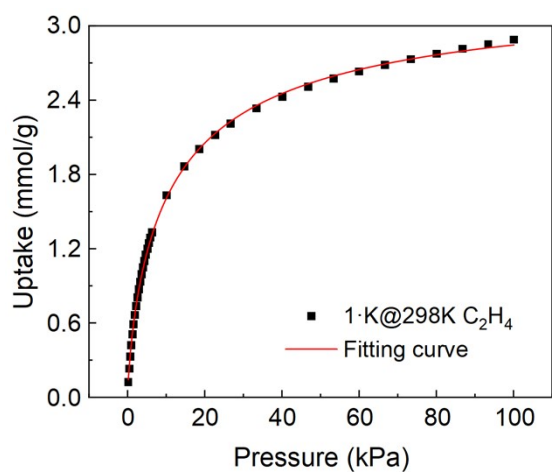

| Model           | LFUser (User)                |
|-----------------|------------------------------|
| Equation        | $A1*b1*x^{c1}/(1+b1*x^{c1})$ |
| Plot            | D                            |
| A1              | $3.36107 \pm 0.02946$        |
| b1              | $0.15083 \pm 0.00159$        |
| c1              | $0.78199 \pm 0.01007$        |
| Reduced Chi-Sqr | 3.42477E-4                   |
| R-Square (COD)  | 0.9996                       |
| Adj. R-Square   | 0.99958                      |

**Fig. S27** Single-site Langmuir-Freundlich (L-F) model fitting for  $C_2H_4$  isotherm of **1·K** at 298 K.

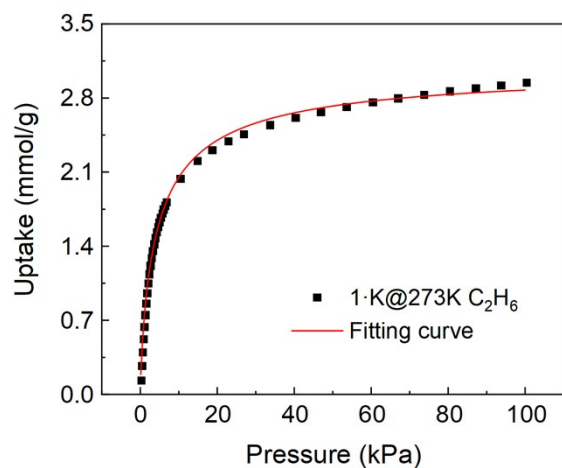

| Model           | LFUser User)             |
|-----------------|--------------------------|
| Equation        | $A1*b1*x^c1/(1+b1*x^c1)$ |
| Plot            | B                        |
| A1              | $3.10265 \pm 0.02924$    |
| b1              | $0.30019 \pm 0.00543$    |
| c1              | $0.81192 \pm 0.01836$    |
| Reduced Chi-Sqr | 0.00138                  |
| R-Square (COD)  | 0.99814                  |
| Adj. R-Square   | 0.99804                  |

**Fig. S28** Single-site Langmuir-Freundlich (L-F) model fitting for C<sub>2</sub>H<sub>6</sub> isotherm of 1-K at 273 K.

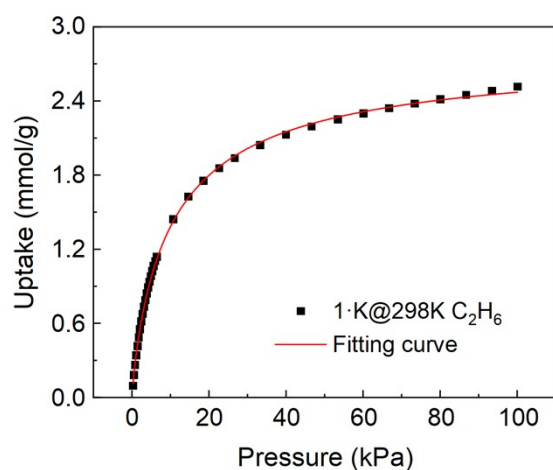

| Model           | LFUser (User)            |
|-----------------|--------------------------|
| Equation        | $A1*b1*x^c1/(1+b1*x^c1)$ |
| Plot            | D                        |
| A1              | $2.81076 \pm 0.02288$    |
| b1              | $0.12928 \pm 0.00174$    |
| c1              | $0.87445 \pm 0.01199$    |
| Reduced Chi-Sqr | 3.25436E-4               |
| R-Square (COD)  | 0.99952                  |
| Adj. R-Square   | 0.99949                  |

**Fig. S29** Single-site Langmuir-Freundlich (L-F) model fitting for C<sub>2</sub>H<sub>6</sub> isotherm of 1-K at 298 K.

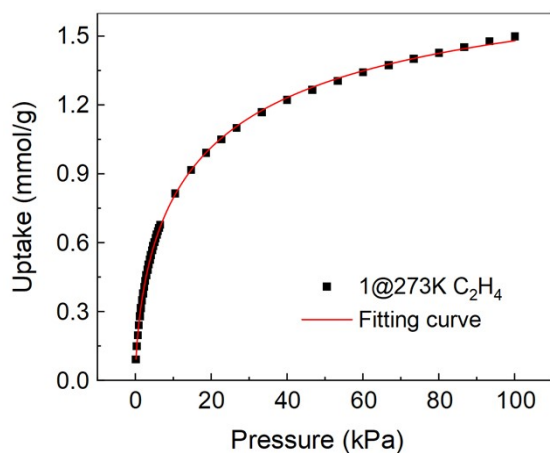

| Model           | LFUser (User)            |
|-----------------|--------------------------|
| Equation        | $A1*b1*x^c1/(1+b1*x^c1)$ |
| Plot            | B                        |
| A1              | $1.96144 \pm 0.02146$    |
| b1              | $0.15105 \pm 0.00134$    |
| c1              | $0.65409 \pm 0.00734$    |
| Reduced Chi-Sqr | 5.87269E-5               |
| R-Square (COD)  | 0.99971                  |
| Adj. R-Square   | 0.99969                  |

**Fig. S30** Single-site Langmuir-Freundlich (L-F) model fitting for C<sub>2</sub>H<sub>4</sub> isotherm of **1** at 273 K.

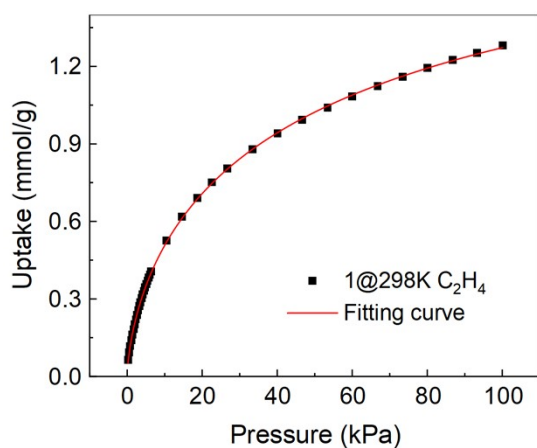

| Model           | LFUser (User)            |
|-----------------|--------------------------|
| Equation        | $A1*b1*x^c1/(1+b1*x^c1)$ |
| Plot            | D                        |
| A1              | $2.18406 \pm 0.03134$    |
| b1              | $0.06558 \pm 6.96526E-4$ |
| c1              | $0.664 \pm 0.00511$      |
| Reduced Chi-Sqr | 1.90573E-5               |
| R-Square (COD)  | 0.99989                  |
| Adj. R-Square   | 0.99988                  |

**Fig. S31** Single-site Langmuir-Freundlich (L-F) model fitting for C<sub>2</sub>H<sub>4</sub> isotherm of **1** at 298 K.

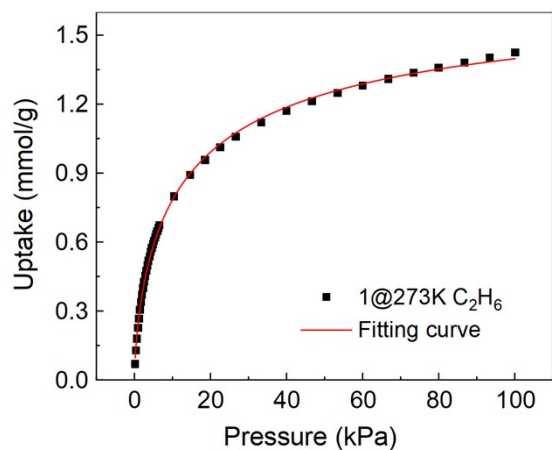

| Model           | LFUser (User)                                      |
|-----------------|----------------------------------------------------|
| Equation        | $A1 \cdot b1 \cdot x^{c1} / (1 + b1 \cdot x^{c1})$ |
| Plot            | B                                                  |
| A1              | $1.75199 \pm 0.02883$                              |
| b1              | $0.16565 \pm 0.00237$                              |
| c1              | $0.6883 \pm 0.01376$                               |
| Reduced Chi-Sqr | $1.81776E-4$                                       |
| R-Square (COD)  | 0.99897                                            |
| Adj. R-Square   | 0.99891                                            |

**Fig. S32** Single-site Langmuir-Freundlich (L-F) model fitting for C<sub>2</sub>H<sub>6</sub> isotherm of **1** at 273 K.

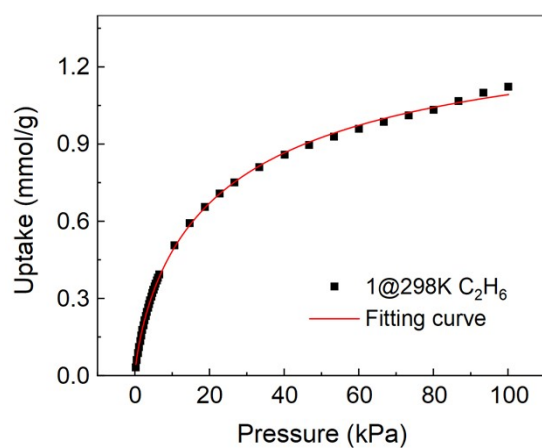

| Model           | LFUser (User)                                      |
|-----------------|----------------------------------------------------|
| Equation        | $A1 \cdot b1 \cdot x^{c1} / (1 + b1 \cdot x^{c1})$ |
| Plot            | D                                                  |
| A1              | $1.46015 \pm 0.03026$                              |
| b1              | $0.08246 \pm 0.0014$                               |
| c1              | $0.77807 \pm 0.01489$                              |
| Reduced Chi-Sqr | $1.11616E-4$                                       |
| R-Square (COD)  | 0.99913                                            |
| Adj. R-Square   | 0.99908                                            |

**Fig. S33** Single-site Langmuir-Freundlich (L-F) model fitting for C<sub>2</sub>H<sub>6</sub> isotherm of **1** at 298 K.

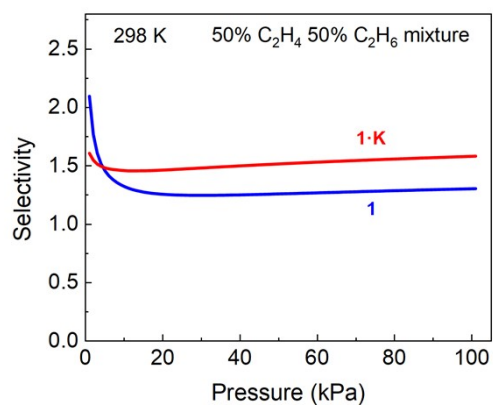

**Fig. S34** IAST selectivities of **1** and **1·K** for equimolar  $C_2H_4/C_2H_6$  at 298 K.

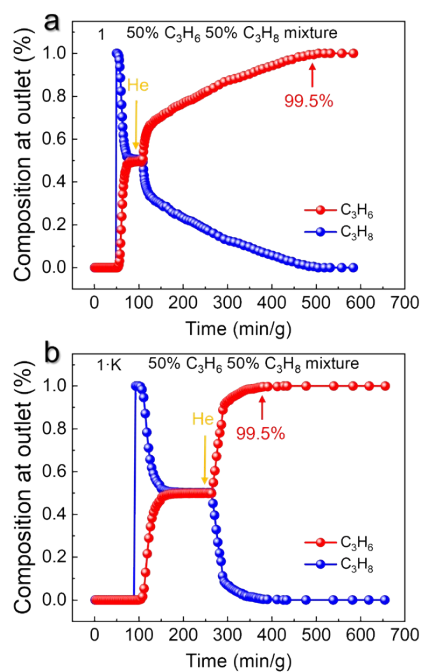

**Fig. S35** Outlet  $C_3H_6$  (red) and  $C_3H_8$  (blue) compositions of the adsorption-desorption cycle in the breakthrough experiment for **1** (a) and **1·K** (b)

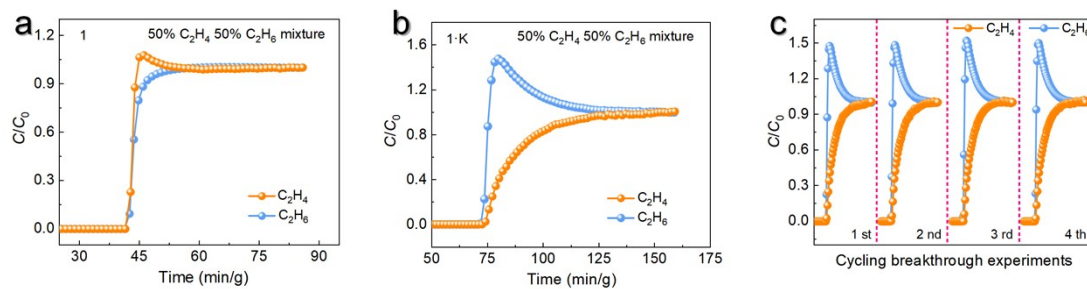

**Fig. S36** The single dynamic breakthrough curves of **1** (a) and **1·K** (b) with equimolar  $C_2H_4/C_2H_6$  gas mixtures at 298 K and 100 kPa. (c) Cycling stability of **1·K**.

## S4 Supplementary tables

**Table S1** ICP analysis results of **1·K**.

| Sample     | K ( $\mu\text{g/mL}$ ) | Cu ( $\mu\text{g/mL}$ ) | Zn ( $\mu\text{g/mL}$ ) | Cu : K (% at. / % at. ) |
|------------|------------------------|-------------------------|-------------------------|-------------------------|
| <b>1·K</b> | 2.62                   | 13.1                    | /                       | 3:1                     |

**Table S2** Summary of the adsorption capacity of  $C_3H_6$  and  $C_3H_8$  and  $C_3H_6/C_3H_8$  (50/50) selectivity in some MOFs.

| No | MOFs                 | $C_3H_6$ uptake ( $\text{cm}^3 \text{g}^{-1}$ ) | $C_3H_8$ uptake ( $\text{cm}^3 \text{g}^{-1}$ ) | IAST selectivity (50/50) | Conditions   | Refs |
|----|----------------------|-------------------------------------------------|-------------------------------------------------|--------------------------|--------------|------|
| 1  | CuBTC                | 179.20                                          | 152.32                                          | /                        | 323K, 100kPa | 1    |
| 2  | KAUST-7              | 32.00                                           | 1.20                                            | /                        | 298K, 100kPa | 2    |
| 3  | $Zn_2(\text{dobdc})$ | 140.90                                          | 122.30                                          | 3.89                     | 318K, 100kPa | 3    |
| 4  | $Mg_2(\text{dobdc})$ | 167.10                                          | 134.40                                          | 5.55                     | 318K, 100kPa | 3    |
| 5  | NJU-Bai8             | 60.48                                           | 1.34                                            | 4.60                     | 298K, 20kPa  | 4    |
| 6  | GeFSIX-2-Cu-i        | 60.26                                           | 40.54                                           | 4.00                     | 298K, 100kPa | 5    |



|    |               |        |       |        |                 |              |
|----|---------------|--------|-------|--------|-----------------|--------------|
| 7  | SiFSIX-2-Cu-i | 59.36  | 37.41 | 4.50   | 298K,<br>100kPa | 5            |
| 8  | Ni-NP         | 79.97  | 47.71 | 10.5   | 298K,<br>100kPa | 6            |
| 9  | MAF-23-O      | 30.2   | 22.4  | 8.80   | 298K,<br>100kPa | 7            |
| 10 | HIAM-301      | 70.784 | 0.67  | 150    | 298K,<br>100kPa | 8            |
| 11 | JNU-3a        | 58.60  | 48.0  | 513    | 303K,<br>100kPa | 9            |
| 12 | NTU-85-WNT    | 10.15  | 0.06  | 1570.3 | 298K,<br>100kPa | 10           |
| 13 | <b>1</b>      | 33.8   | 27.7  | 2.20   | 298K,<br>100kPa | This<br>work |
| 14 | <b>1·K</b>    | 64.5   | 53.0  | 4.38   | 298K,<br>100kPa | This<br>work |

---

## References

- 1 N. Lamia, M. Jorge, M. A. Granato, F. A. Almeida Paz, H. Chevreau and A. E. Rodrigues, *Chem. Eng. Sci.*, 2009, **64**, 3246-3259.
- 2 A. Cadiou, K. Adil, P. M. Bhatt, Y. Belmabkhout and M. Eddaoudi, *Science*, 2016, **353**, 137-140.
- 3 S. J. Geier, J. A. Mason, E. D. Bloch, W. L. Queen, M. R. Hudson, C. M. Brown and J. R. Long, *Chem. Sci.*, 2013, **4**, 2054-2061.
- 4 X. Wang, R. Krishna, L. Li, B. Wang, T. He, Y.-Z. Zhang, J.-R. Li and J. Li, *Chem. Eng. J.*, 2018, **346**, 489-496.
- 5 X. Wang, P. Zhang, Z. Zhang, L. Yang, Q. Ding, X. Cui, J. Wang and H. Xing, *Ind. Eng. Chem. Res.*, 2020, **59**, 3531-3537.
- 6 Y. Xie, Y. Shi, H. Cui, R.-B. Lin and B. Chen, *Small Struct.*, 2022, **3**, 2100125.
- 7 Y. Wang, N. Y. Huang, X. W. Zhang, H. He, R. K. Huang, Z. M. Ye, Y. Li, D. D. Zhou, P. Q. Liao, X. M. Chen and J. P. Zhang, *Angew. Chem. Int. Ed.*, 2019, **58**, 7692-7696.
- 8 L. Yu, X. Han, H. Wang, S. Ullah, Q. Xia, W. Li, J. Li, I. da Silva, P. Manuel, S. Rudic, Y. Cheng, S. Yang, T. Thonhauser and J. Li, *J. Am. Chem. Soc.*, 2021, **143**, 19300-19305.
- 9 H. Zeng, M. Xie, T. Wang, R. J. Wei, X. J. Xie, Y. Zhao, W. Lu and D. Li, *Nature*, 2021, **595**, 542-548.
- 10 Q. Dong, Y. Huang, J. Wan, Z. Lu, Z. Wang, C. Gu, J. Duan and J. Bai, *J. Am. Chem. Soc.*, 2023, **145**, 8043-8051.
